# Supplementary material for: MAURIVAX: A Vaccination Campaign Project in a Hospital Environment for Patients Affected by Autoimmune Diseases and Adult Primary Immunodeficiencies
Source: MDPI journal article supplement (doi:10.3390/vaccines11101579), 2023-10-11
Supplement: s1 [file s1]

## Supplementary Material

**Table S1.** Doses of vaccines administered, divided for each type of vaccine and stratified by degree of immunosuppression and disease.

| Autoimmune disease-<br>vaccinated patients                           | Type of<br>immunosuppressive<br>therapy | N° (%)<br>patients | N° of administered doses |             |           |           |          |          |
|----------------------------------------------------------------------|-----------------------------------------|--------------------|--------------------------|-------------|-----------|-----------|----------|----------|
|                                                                      |                                         |                    | Shingrix                 | Prevenar 13 | Pneumovax | Bexsero   | Menveo   | Hiberix  |
| Not taking<br>immunosuppressive<br>therapy                           |                                         | 9 (25%)            | 18                       | 2           | 1         | 2         | 1        | 0        |
| Taking<br>Immunosuppressive<br>therapy                               | Combined high grade                     | 16 (44,4%)         | 32                       | 2           | 0         | 2         | 1        | 0        |
|                                                                      | Single high grade                       | 8 (22,2%)          | 16                       | 0           | 0         | 2         | 1        | 0        |
|                                                                      | Single low/moderate<br>grade            | 3 (8,3%)           | 6                        | 1           | 0         | 2         | 1        | 1        |
| PID (confirmed or highly suggestive)                                 |                                         | N° (%)<br>patients | Shingrix                 | Prevnar-13  | Pneumovax | Baxero    | Menveo   | Hiberix  |
| Highly suspected common variable<br>immunodeficiency being diagnosed |                                         | 2 (28,5%)          | 4                        | 0           | 0         | 0         | 0        | 0        |
| Confirmed Common Variable Immunodeficiency<br>(CVID)                 |                                         | 2 (28,5%)          | 4                        | 1           | 1         | 0         | 0        | 0        |
| Confirmed IgG deficiency                                             |                                         | 2 (28,5%)          | 4                        | 0           | 0         | 2         | 0        | 0        |
| Confirmed X-linked agammaglobulinemia                                |                                         | 1 (14,2%)          | 2                        | 0           | 0         | 0         | 0        | 0        |
| Organ transplant (liver)                                             |                                         | 1                  | 2                        | 1           | 0         | 0         | 0        | 0        |
| Severe asthma                                                        |                                         | 1                  | 2                        | 0           | 0         | 0         | 0        |          |
| <b>Total</b>                                                         |                                         | <b>45</b>          | <b>90</b>                | <b>7</b>    | <b>2</b>  | <b>10</b> | <b>4</b> | <b>1</b> |
